# Supplementary material for: Adherence to Hunger Training over 6 Months and the Effect on Weight and Eating Behaviour: Secondary Analysis of a Randomised Controlled Trial
Source: PubMed Central journal article supplement (PMC5707732; doi:10.3390/nu9111260), 2017-11-17
Supplement: nutrients-09-01260-s001.pdf [file nutrients-09-01260-s001.pdf]

**Table S1.** Coefficients of the multiple regression model examining the effect of frequency of booklet entry, controlling for sex, on weight change (kg) at 12 months.

| Variable                                             | Point estimate | 95% CI <sup>1</sup> |       | <i>p</i> -value <sup>1</sup> |
|------------------------------------------------------|----------------|---------------------|-------|------------------------------|
|                                                      |                | Lower               | Upper |                              |
| (Intercept)                                          | 1.03           |                     |       |                              |
| Sex (male vs female)                                 | -5.7           | -11.18              | -0.14 | 0.045                        |
| Frequency of booklet entry: 30–59 days <sup>2</sup>  | -2.4           | -10.9               | 6.1   | 0.562                        |
| Frequency of booklet entry: 60–140 days <sup>2</sup> | -6.8           | -12.6               | -1.0  | 0.024                        |

Multiple R-squared: 0.295, adjusted R-squared: 0.203. <sup>1</sup> Adjusted for multiple analysis using the Westfall method. <sup>2</sup> Against the 0–30 days group.
